# Supplementary material for: Polyamidoamide Dendrimers and Cross-Linking Agents for Stabilized Bioenzymatic Resistant Metal-Free Bovine Collagen
Source: Molecules. 2019 Oct 7;24(19):3611. doi: 10.3390/molecules24193611 (PMC6803940; doi:10.3390/molecules24193611)
Supplement: Supplementary file 1 [file molecules-24-03611-s001.pdf]

# *Supplementary Materials*

## **Polyamidoamide dendrimers and cross-linking agents for stabilized bioenzymatic resistant metal free bovine collagen**

*Valentina Beghetto,<sup>\*,†</sup> Vanessa Gatto,<sup>†</sup> Silvia Conca,<sup>†</sup> Noemi Bardella,<sup>†</sup> Alberto Scrivanti<sup>†</sup>*

<sup>†</sup> Department of Molecular Sciences and Nanosystems, University Ca' Foscari Venice, Via Torino 155, 30172 Mestre (Venice), ITALY

<sup>‡</sup> Crossing Ltd., Viale della Repubblica 193/b, 31100 Treviso, ITALY

\*Corresponding Author: E-mail: beghetto@unive.it

### **Table of contents**

Synthesis and characterization of 2-*Triet*- from G-0.5 to G1.0.

**Figure S1.** chemical formula of 2-*Triet*-G-0.5

**Figure S2.** <sup>1</sup>H NMR spectra of 2-*Triet*-G-0.5

**Figure S3.** <sup>13</sup>C NMR spectra of 2-*Triet*- G-0.5

**Figure S4.** chemical formula of 2-*Triet*- G0.0

**Figure S5.** chemical formula of 2-*Triet*- G0.5

**Figure S6.** <sup>1</sup>H NMR spectra of 2-*Triet*-G0.5

**Figure S7.** <sup>13</sup>C NMR spectra of 2-*Triet*-G0.5

**Figure S8.** chemical formula of 2-*Triet*-G1.0

**Figure S9.** <sup>1</sup>H NMR spectra of 2-*Triet*-G1.0

**Figure S10.** <sup>13</sup>C NMR spectra of 2-*Triet*-G1.0

### **References**

### Synthesis of 2-*Triet*-G-0.5

10 mL (9.56 g, 0.11 mol) of methyl acrylate were added drop wise to a solution of diethylentriamine (1.91 g, 0.018 mol) in 100 mL of methanol. The resulting solution was stirred at room temperature for 5 days, then the excesses of methyl acrylate and methanol were evaporated under vacuum to give 2-*Triet*-G-0.5 as a colorless oil (9.58 g, 0.018 mol, 99% yield).

$^1\text{H}$  NMR ( $\text{CDCl}_3$ , 300 MHz)  $\delta$ : 3.52 (s, 15H), 2.63 (t, 10H,  $J_{\text{H,H}} = 6.9$  Hz), 2.36 (s, 8H), 2.29 (t, 10H,  $J_{\text{H,H}} = 6.9$  Hz).  $^{13}\text{C}\{^1\text{H}\}$  NMR ( $\text{CDCl}_3$ , 75 MHz)  $\delta$ : 172.69 (1C), 172.56 (4C), 52.55 (2C), 51.99 (2C), 51.17 (5C), 50.15 (1C), 49.54 (4C), 32.36 (5C). MS/ESI ( $\text{C}_{24}\text{H}_{43}\text{N}_3\text{O}_{10}$ ):  $m/z$  533.29, found: 556.3  $[\text{M}+\text{Na}]^+$ .

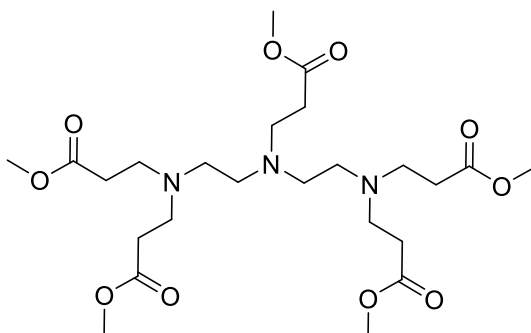

**Figure S1.** chemical formula of 2-*Triet*-G-0.5

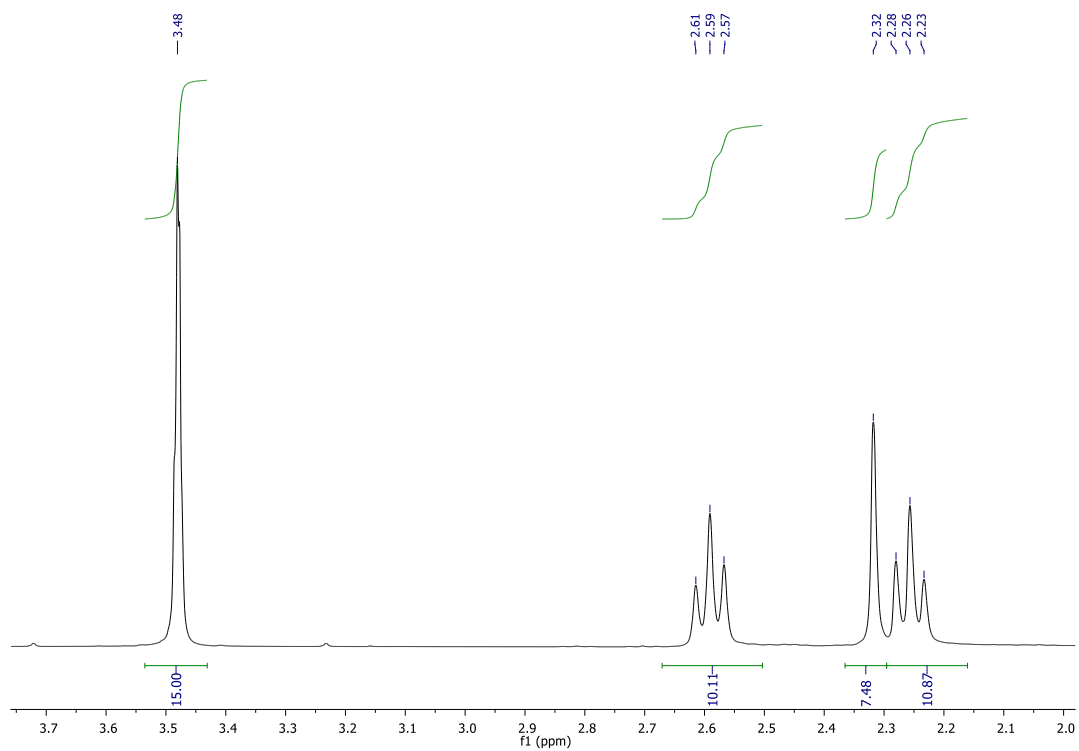

**Figure S2.** <sup>1</sup>H NMR spectra of 2-Triet-G-0.5.

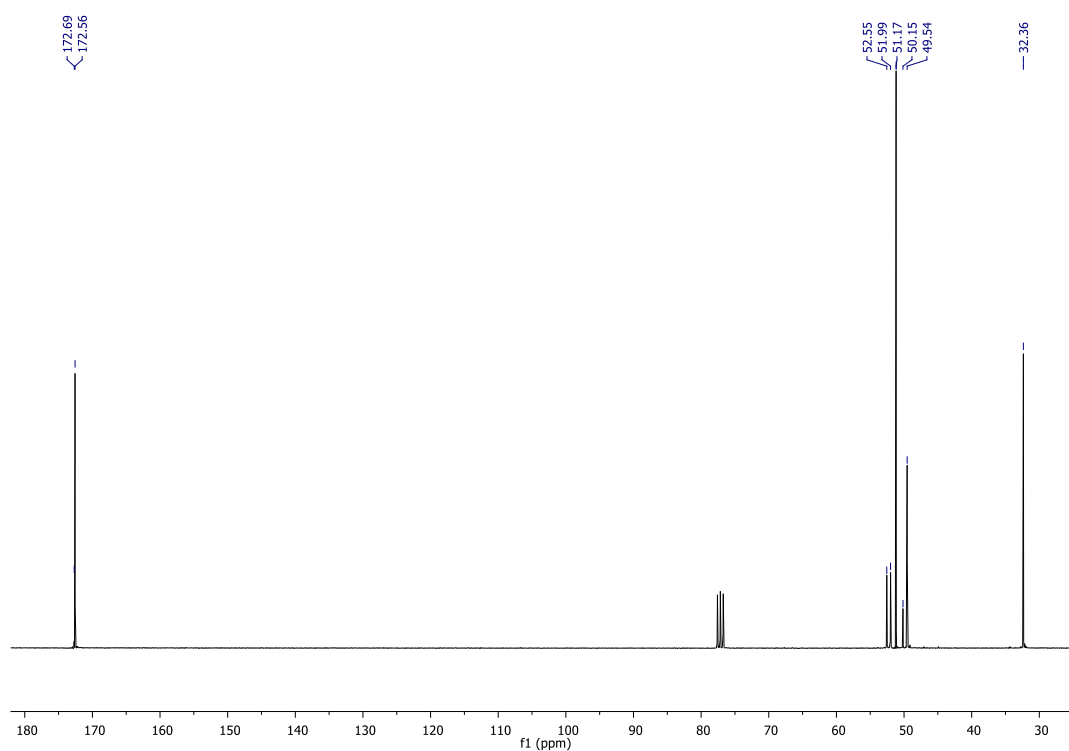

**Figure S3.** <sup>13</sup>C NMR spectra of 2-Triet-G-0.5.

**Synthesis of 2-Triet-G 0.0** was carried out as reported by Dietrich.<sup>1</sup>

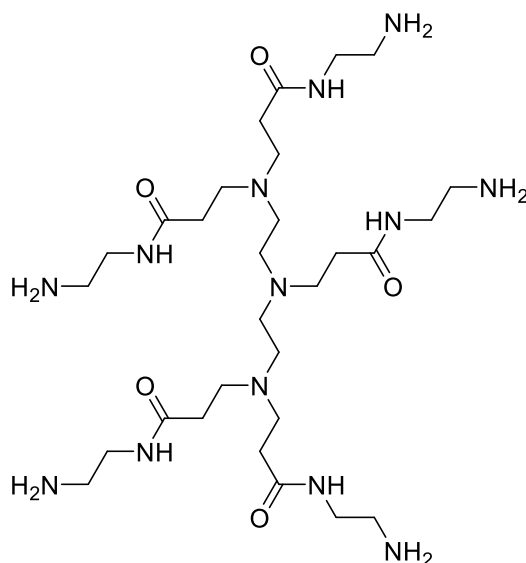

**Figure S4.** chemical formula of 2-Triet-G0.0.

### **Synthesis of 2-Triet-G 0.5**

2.35 g of methyl acrylate (27.0 mmol) were added drop wise to a methanol solution of 2-Triet-G0.0 (0.18 g, 0.27 mmol, in 3 mL). After stirring for 20 h at room temperature, the excesses of methyl acrylate and methanol were removed under high vacuum, to give a colourless oil (0.39 g, 97%).

<sup>1</sup>H NMR (CDCl<sub>3</sub>, 300 MHz)  $\delta$ : 7.13 (br, 5H), 3.59 (s, 30H), 3.19 (m, 10H), 2.69 (t, 30H,  $J_{\text{H,H}} = 6.5$  Hz), 2.47 (t, 18H,  $J = 6.5$  Hz), 2.39 (t, 20H,  $J_{\text{H,H}} = 6.5$  Hz), 2.28 (t, 10H,  $J_{\text{H,H}} = 6.5$  Hz).  
<sup>13</sup>C{<sup>1</sup>H} NMR (CDCl<sub>3</sub>, 75 MHz)  $\delta$ : 172.92 (10C), 172.21 (5C), 52.89 (5C), 51.54 (10C), 50.10 (4C), 49.24 (15C), 37.15 (5C), 33.73 (5C), 32.63 (10C). MS/ESI (C<sub>69</sub>H<sub>123</sub>N<sub>13</sub>O<sub>25</sub>): m/z 1533.87 found 1534.8 [M+H]<sup>+</sup>, 1556.8 [M+Na]<sup>+</sup>.

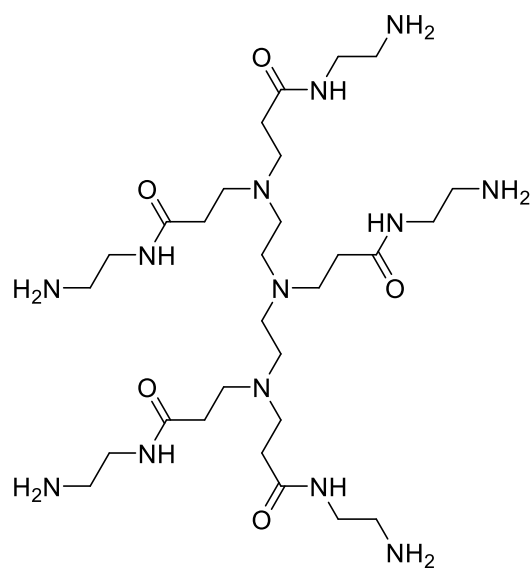

**Figure S5.** chemical formula of 2-Triet-G0.5.

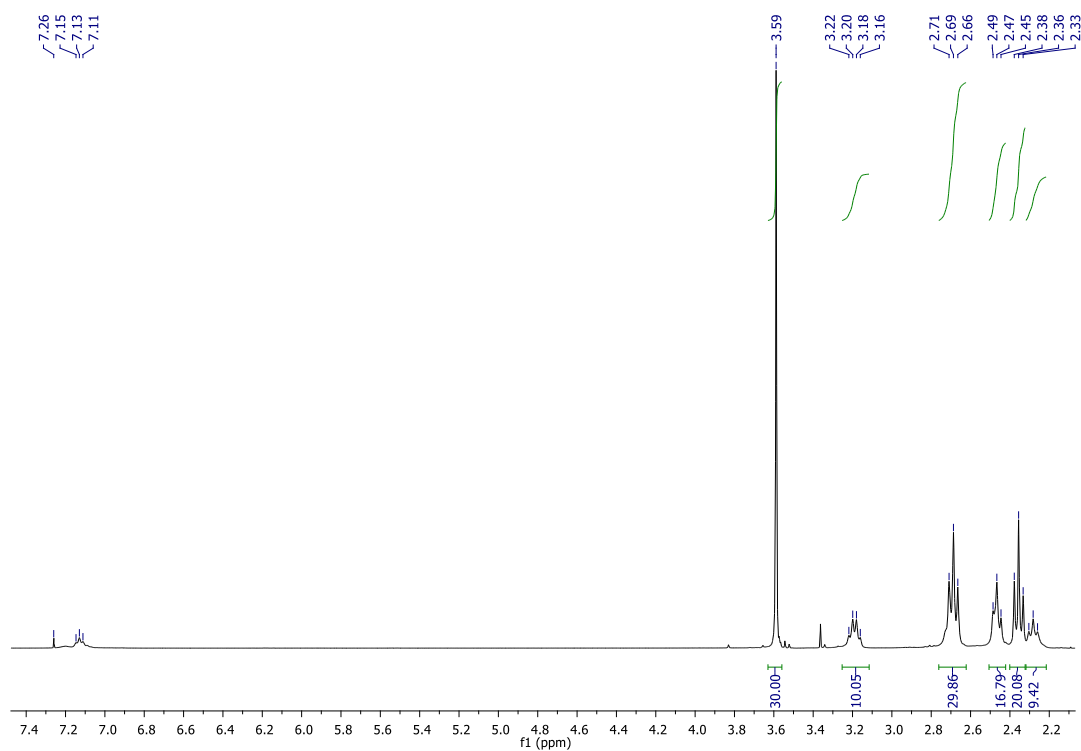

**Figure S6.** <sup>1</sup>H NMR spectra of 2-Triet-G0.5.

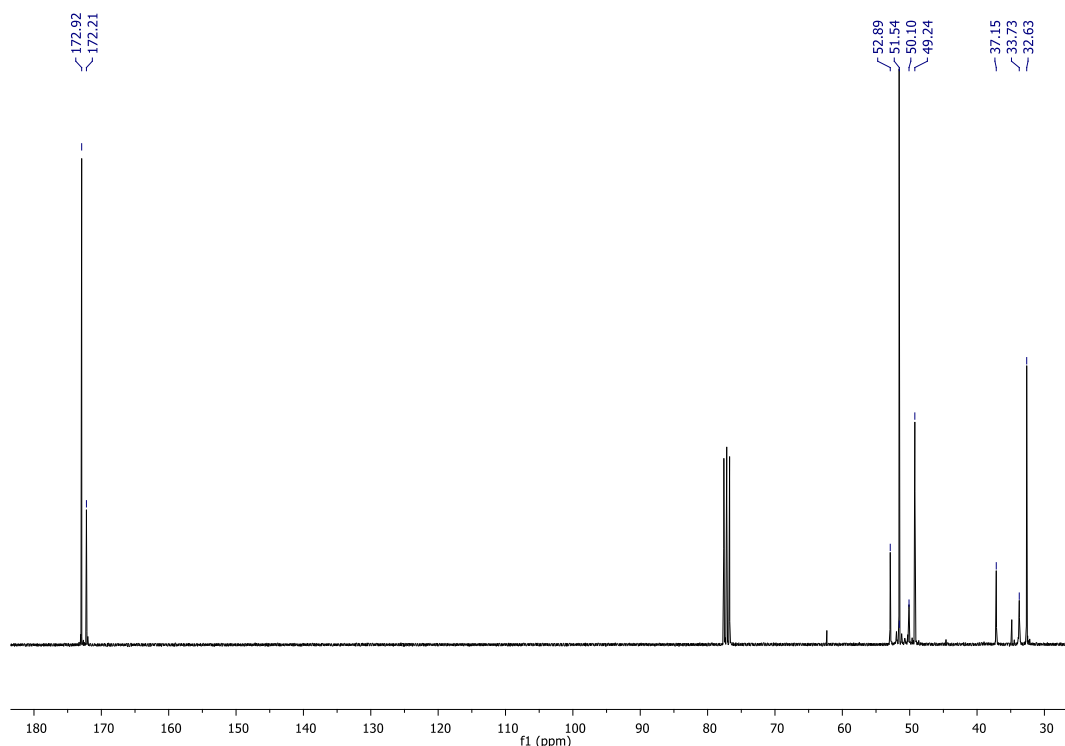

**Figure S7.**  $^{13}\text{C}$  NMR spectra of 2-*Triet*-G0.5.

### Synthesis of 2-*Triet*-G1.0

A methanol solution of ethylenediamine (13 g, 0.21 mol, in 7 mL) was added drop wise to a methanol solution of 2-*Triet*-G0.5 (0.34 g, 0.22 mmol, in 3 mL) at 0 °C. The resulting solution was stirred at room temperature for 5 days, then the excesses of ethylenediamine and methanol were evaporated under vacuum to give a colorless oil (0.39 g, 98%).

$^1\text{H}$  NMR ( $\text{CDCl}_3$ , 300 MHz)  $\delta$ : 8.01 (br, 5H), 7.76 (br, 10H), 3.23 (m, 30H), 2.77 (t, 30H,  $J_{\text{H,H}} = 6.9$  Hz), 2.71 (bs, 30H), 2.48 (t, 18H,  $J_{\text{H,H}} = 6.9$  Hz), 2.32 (t, 30H,  $J_{\text{H,H}} = 6.9$  Hz), 1.79 (bs, 20H).  $^{13}\text{C}\{^1\text{H}\}$  NMR ( $\text{CDCl}_3$ , 75 MHz)  $\delta$ : 172.94 (10C), 172.58 (5C), 52.83 (5C) 51.81 (2C), 51.33 (2C), 50.55 (10C), 50.09 (5C), 42.27 (10C), 41.53 (15C), 34.4 (10C), 33.9 (5C). MS/ESI ( $\text{C}_{79}\text{H}_{173}\text{N}_{33}\text{O}_{15}$ ):  $m/z$  1814.30 found 1815.3  $[\text{M}+\text{H}]^+$ , 1837.3  $[\text{M}+\text{Na}]^+$ .

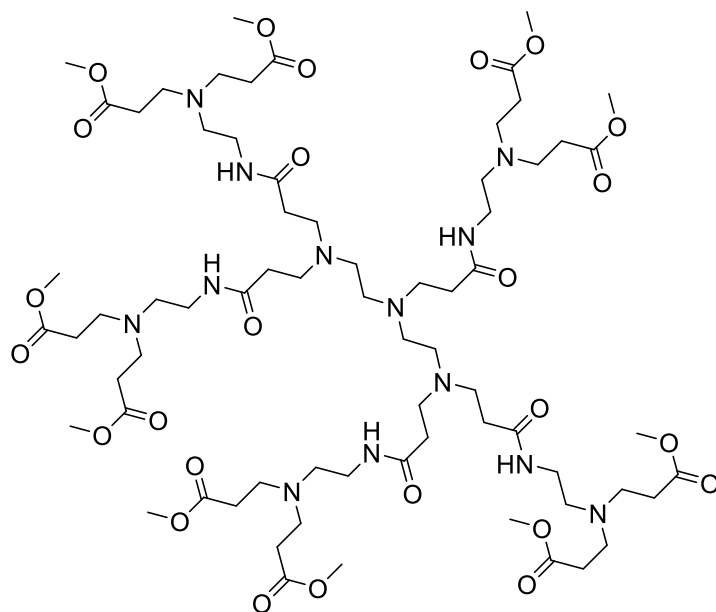

**Figure S8.** chemical formula of 2-Triet-G1.0.

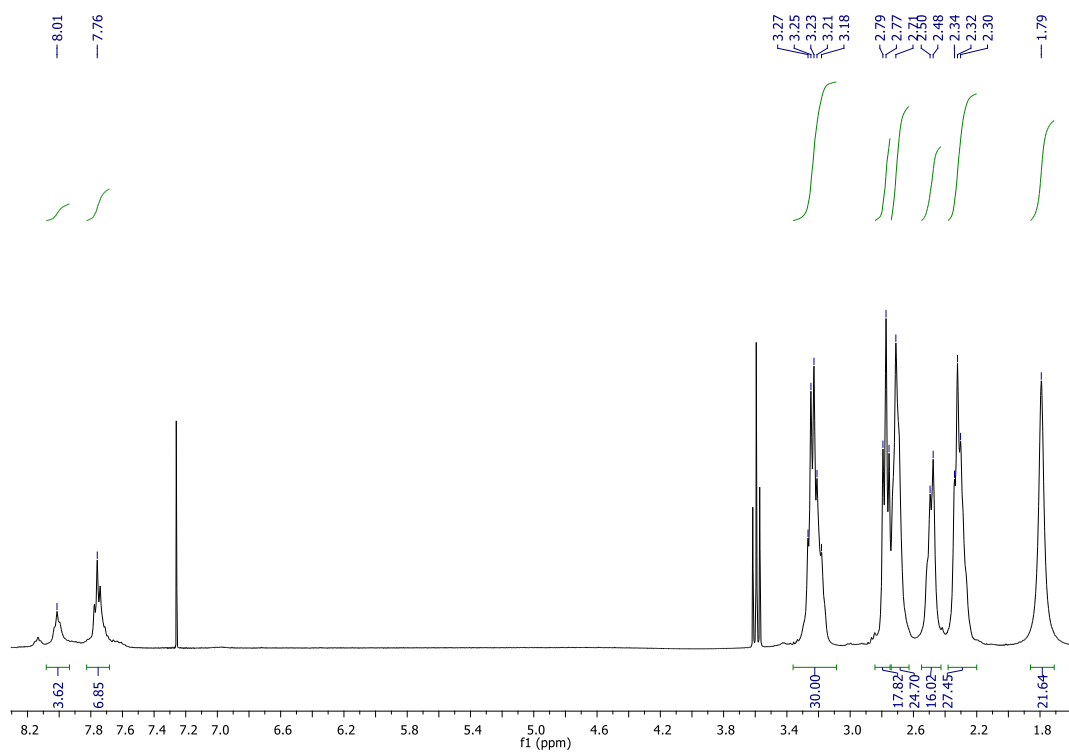

**Figure S9.** <sup>1</sup>H NMR spectra of 2-Triet-G1.0.

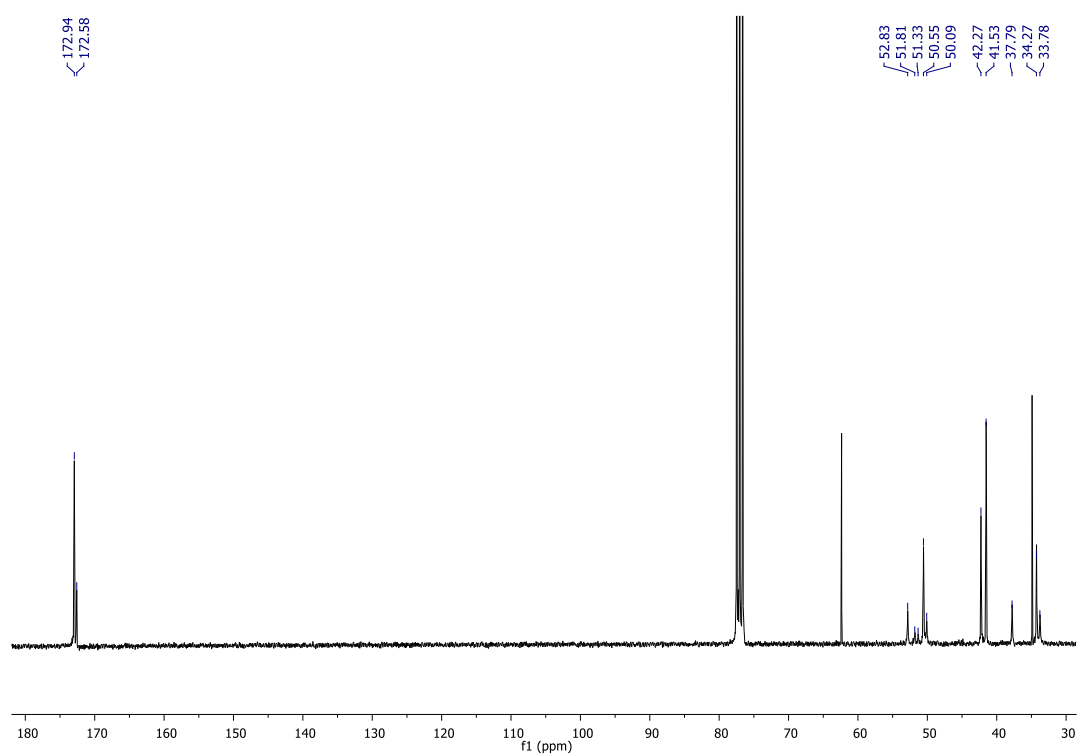

**Figure S10.**  $^{13}\text{C}$  NMR spectra of 2-*Triet*-G1.0.

## References

- (1) Dietrich, S.; Nicolai, A.; Lang, H. Amidoamine-based dendrimers with end-grafted Pd–Fe units: Synthesis, characterization and their use in the Heck reaction. *J. Organomet. Chem.* **2011**, 696, 739–747.
